# Supplementary material
Source: PubMed Central journal article supplement (PMC7357319)

## Supplementary Methods

### Search Strategy and Results

Search concepts and developing search queries

- Approach: Create database specific search queries that use a combination of concepts and terms that are pulled from study questions and previously identified articles of interest. Example search strategy: **Term(s) A** AND **Term(s) B** AND **Term C**.
- Identified databases for search queries: PubMed, EMBASE, Scopus, CINAHL (NEW)
- Concepts and Terms:
  - A. **Cancer Concept**
    - Neoplasm [Mesh]
    - Cancer
  - B. **Health Insurance Concept**
    - Insurance
    - Medicaid
  - C. **Health Insurance Enrollment Concept**
    - Enrollment
    - Enroll
    - Enrolling
    - Enrolled
    - Enrollees
- Fields: abstract and/or title
- Publication type: Article
- Publication time: Before July 31<sup>st</sup>, 2019

**Supplementary Table 1.** Results of search queries conducted using PubMed, Scopus, and CINAHL databases.

| Database | Search Query                                                                                                                                                                                     | No. of Papers Identified |
|----------|--------------------------------------------------------------------------------------------------------------------------------------------------------------------------------------------------|--------------------------|
| PubMed   | ("neoplasms"[MeSH Terms] OR "cancer"[tiab]) AND ("insurance"[tiab] OR "Medicaid"[tiab]) AND ("enrollment"[tiab] OR "enroll"[tiab] OR "enrolling"[tiab] OR "enrolled"[tiab] OR "enrollees"[tiab]) | 893                      |
| EMBASE   | ("neoplasms" OR "cancer"[tiab]) AND ("insurance"[tiab] OR "Medicaid"[tiab]) AND ("enrollment"[tiab] OR "enroll"[tiab] OR "enrolling"[tiab] OR "enrolled"[tiab] OR "enrollees"[tiab])             | 776                      |
| Scopus   | ("neoplasms" OR "cancer"[tiab]) AND ("insurance"[tiab] OR "Medicaid"[tiab]) AND ("enrollment"[tiab] OR "enroll"[tiab] OR "enrolling"[tiab] OR "enrolled"[tiab] OR "enrollees"[tiab])             | 1145                     |
| CINAHL   | ("neoplasms" OR "cancer"[tiab]) AND ("insurance"[tiab] OR "Medicaid"[tiab]) AND ("enrollment"[tiab] OR "enroll"[tiab] OR "enrolling"[tiab] OR "enrolled"[tiab] OR "enrollees"[tiab])             | 499                      |
|          | Total with duplicates                                                                                                                                                                            | 3313                     |
|          | Duplicates                                                                                                                                                                                       | 1790                     |
|          | <b>Total</b>                                                                                                                                                                                     | <b>1523</b>              |

Supplementary Figure 1. Systematic Literature Review Flow Chart

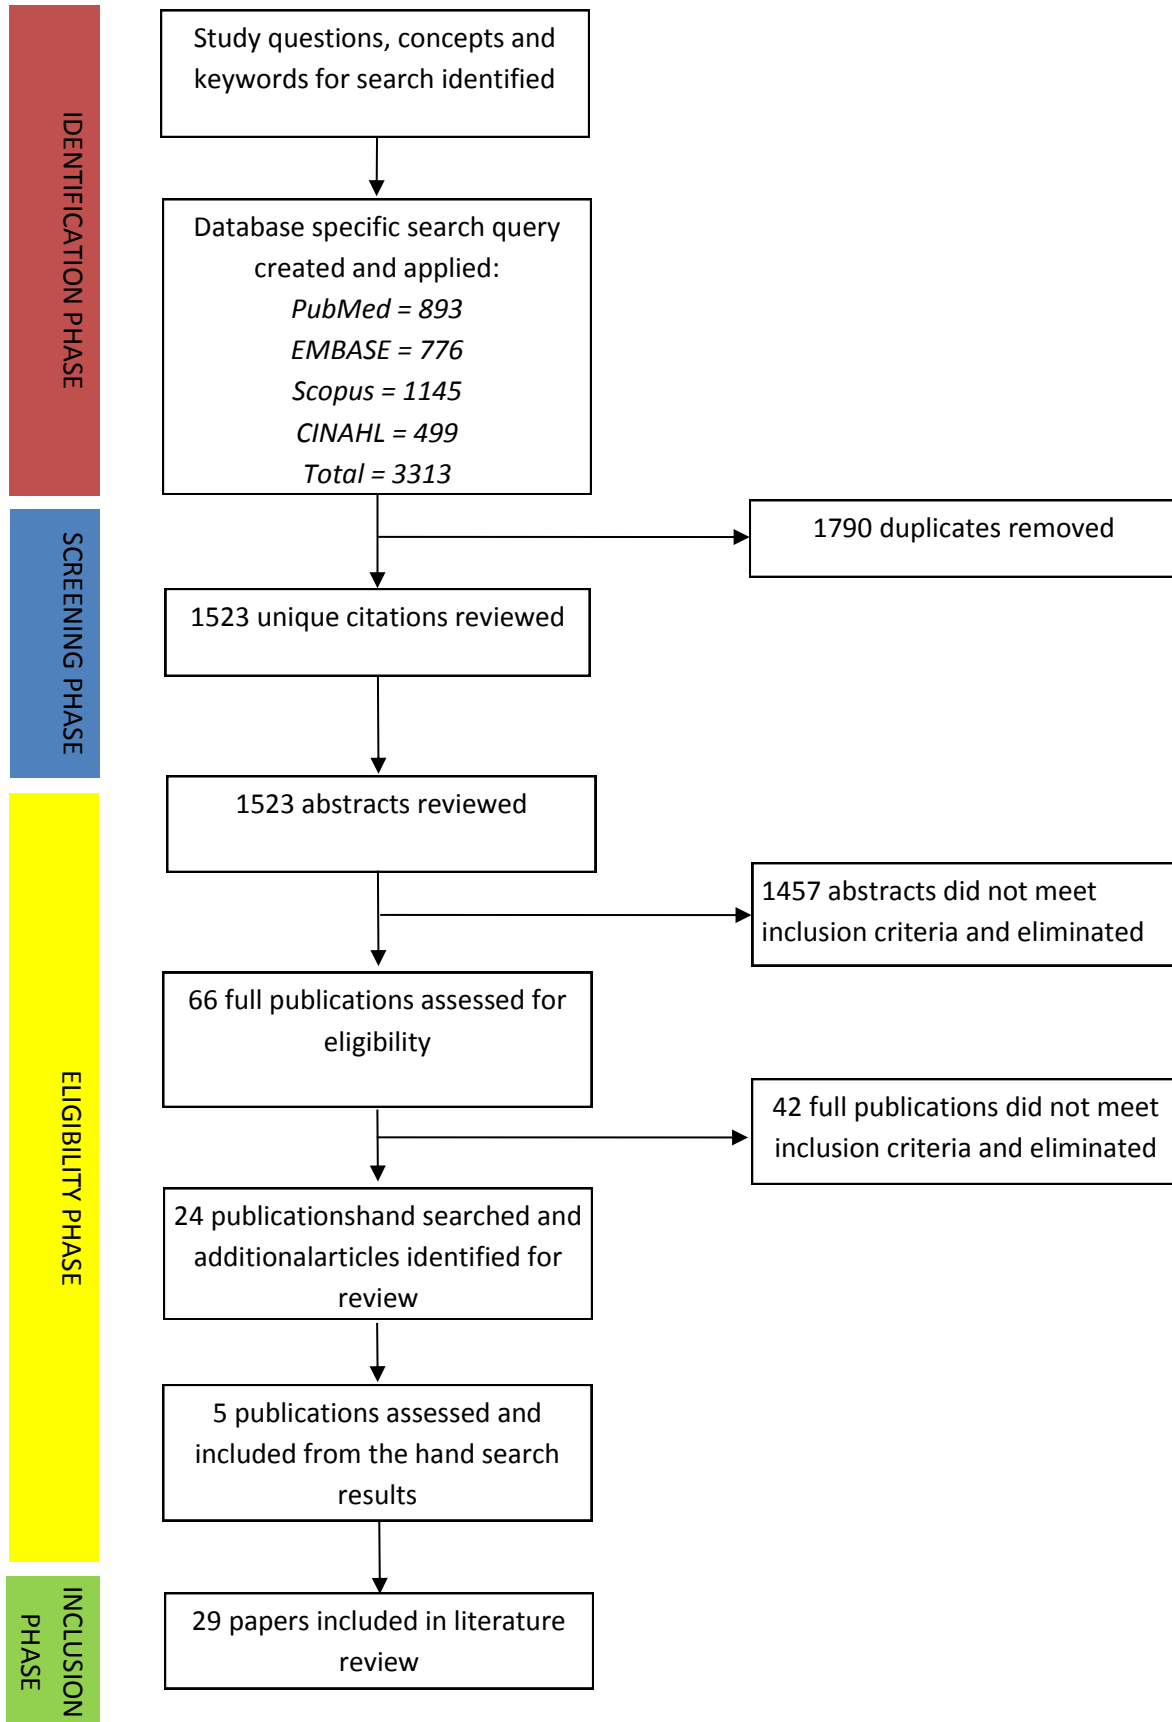

Supplement: djaa048_supplementary_data.pdf [file djaa048_supplementary_data.pdf]
